# Supplementary material for: Prevalence and predictors of germline CDKN2A mutations for melanoma cases from Australia, Spain and the United Kingdom
Source: PubMed Central journal article supplement (PMC4361137; doi:10.1186/1897-4287-12-20), 2014-11-20

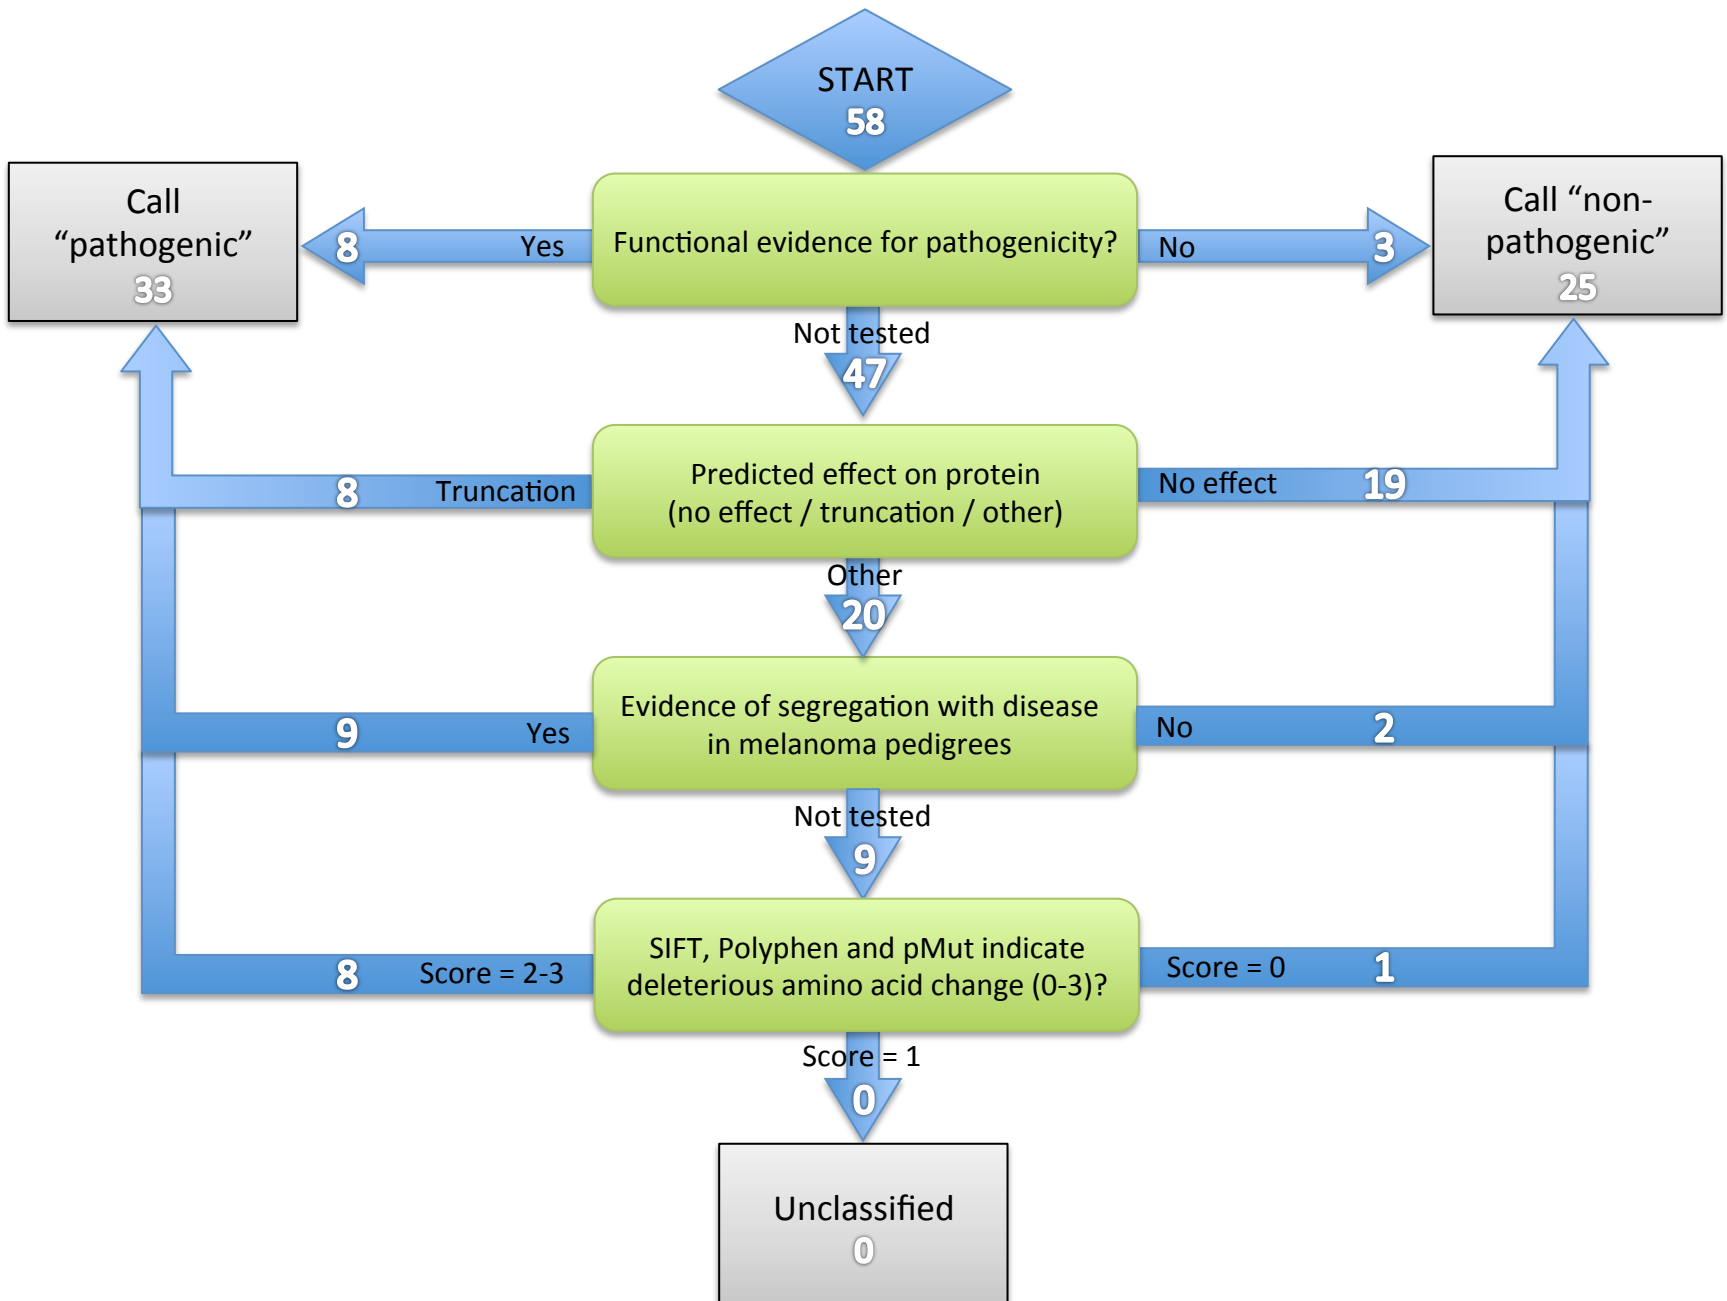

Supplement: 13053_2014_472_MOESM1_ESM.pdf [file 13053_2014_472_MOESM1_ESM.pdf]
